# Supplementary material
Source: PubMed Central journal article supplement (PMC3501019)

## SUPPLEMENTAL INFORMATION

**FIGURE S1.** Data comparison of two biological replicates in heatmaps.  $\text{Log}_2(\text{L}/\text{H})$  data listed in Table S1A and Table S2A were used in generating the data. Proteins are listed with one of the replicates aligned from low  $\text{Log}_2(\text{L}/\text{H})$  value to high  $\text{Log}_2(\text{L}/\text{H})$  value. (A) Total mitochondrial proteins; (B) Assembled mitochondrial proteins.

**FIGURE S2.** Comparison of YtA and YtB mitochondrial proteins by Western blotting. Equal amounts of mitochondrial proteins from YtA and YtB were run on tricine-SDS-PAGE and stained with Coomassie Blue G250. Western blots were probed with antibodies to HSP60, ATP1, PHB2, NAD9, ORFB, CYTC, or ORFH79.

**FIGURE S3.** Heatmap generated from the number of identified peptides per protein versus BN gel fractions, showing the correlation of certain subunits with their relevant complexes.

**FIGURE S4.** Equal amounts of mitochondrial proteins from the ORFH79 positive transgenic line (Trans79) and blank-vector negative transgenic line (TransBL) were resolved by tricine-SDS PAGE and silver stained. In-gel activity of Complex V was compared between Trans79 and TransBL.

**FIGURE S5.** Immunoprecipitation of ORFH79 and other selected proteins in YtA and YtB mitochondrial extracts. Lane 1: YtA mitochondria IP with anti-ORFH79 serum; Lane 2: YtB mitochondria IP with anti-ORFH79 serum; Lane 3: YtA mitochondria IP with pre-immune serum; Lane 4: YtA mitochondria IP with anti-PHB2 serum; Lane 5: YtA mitochondria IP with anti-HSP60 serum; Lane 6: YtA mitochondria IP with normal IgG from rabbits. Lane 7 was a positive control of the whole SDS-denatured extract of YtA mitochondria. The antibodies used for detection are indicated on the right.

**FIGURE S6.** The MS spectra of peptide GFQDVLAWADAER used for the identification and quantitation of sex determination protein tasselseed-2 (Os07g46920.1). (A and B) The MS2 spectra of light or heavy labeled peptides used for peptide identification. (C) The MS1 spectra of light or heavy labeled peptides used for peptide relative quantitation.

### **Table S1. Quantitative analysis of total mitochondrial proteins.**

#### **Table S1A . Total mitochondrial protein summary.**

Columns A, B-D, E-G, H-K, L, M-O represent the TIGR locus number, protein data of biological replication 1# (Number of identified peptides, quantitated ratio [L/H; YtA/YtB], standard deviation), protein data of biological replication 2#, summary information (average ratio [L/H; YtA/YtB], standard deviation, *p*-value, whether significant different to ratio=1), molecular mass and functional description of identified total mitochondrial proteins from Honglian CMS rice, respectively. Columns P, Q, R, and S-T show TAIR locus number, E-Value, abbreviated name, and functional description of the orthologous *Arabidopsis* proteins.

#### **Table S1B. Peptide summary of biological replication #1**

#### **Table S1C. Peptide summary of biological replication #2**

### **Table S2. Quantitative analysis of assembled mitochondrial proteins.**

#### **Table S2A . Assembled mitochondrial protein summary.**

Columns A, B, C-E, F-H, I-L, M, N-P represent the corresponding fraction on the BN gel fraction, TIGR locus number, protein data of biological replication 1# (Number of identified peptides, quantitated ratio [L/H; YtA/YtB], standard deviation), protein data of biological replication 2#, summary information (average ratio [L/H; YtA/YtB], standard deviation, *p*-value, whether significant different to ratio=1), molecular mass and functional description of identified assembled mitochondrial proteins from Honglian CMS rice, respectively. Columns Q, R, S, and T-U show TAIR locus number, E-Value, abbreviated name, and functional description of the orthologous *Arabidopsis* proteins.

#### **Table S2B. Peptide summary of biological replication #1**

#### **Table S2C. Peptide summary of biological replication #2**



**A**

Log<sub>2</sub>(L/H) of Total Mitochondrial Proteins

-1.8 0 1.0

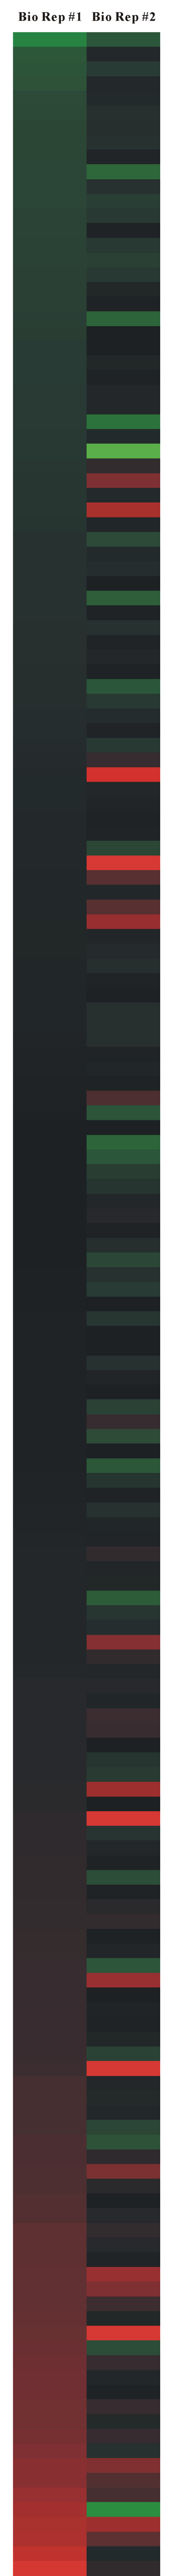

**B**

Log<sub>2</sub>(L/H) of Assembled Mitochondrial Proteins

-4.7 -1.2 1.6

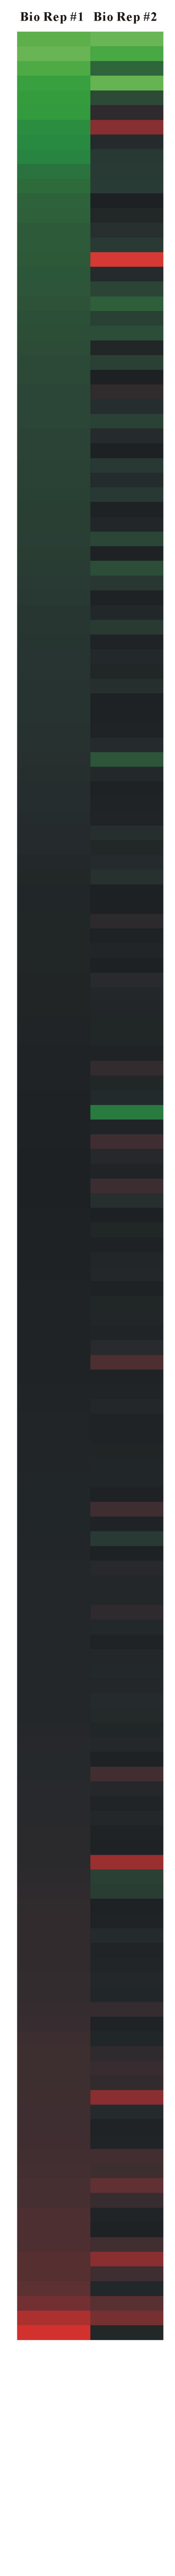



# Figure S2

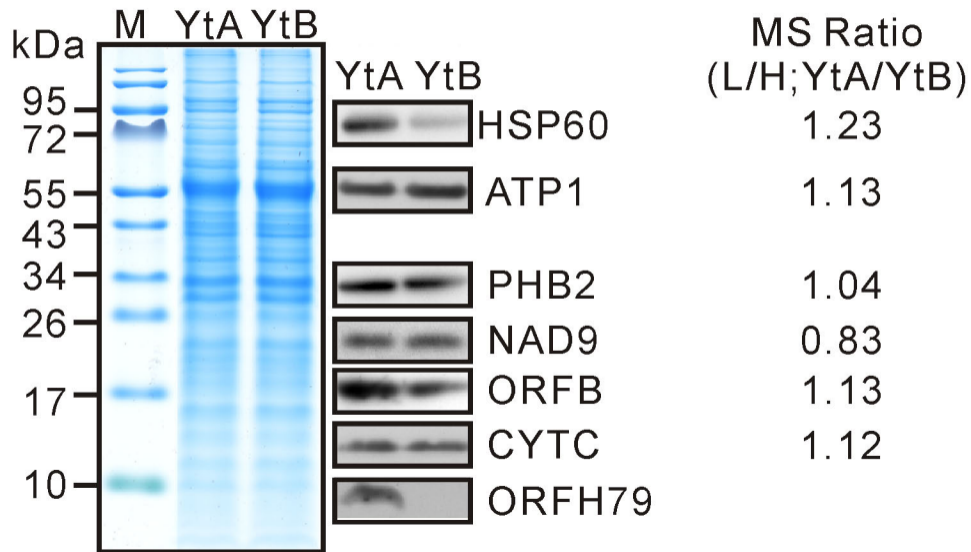

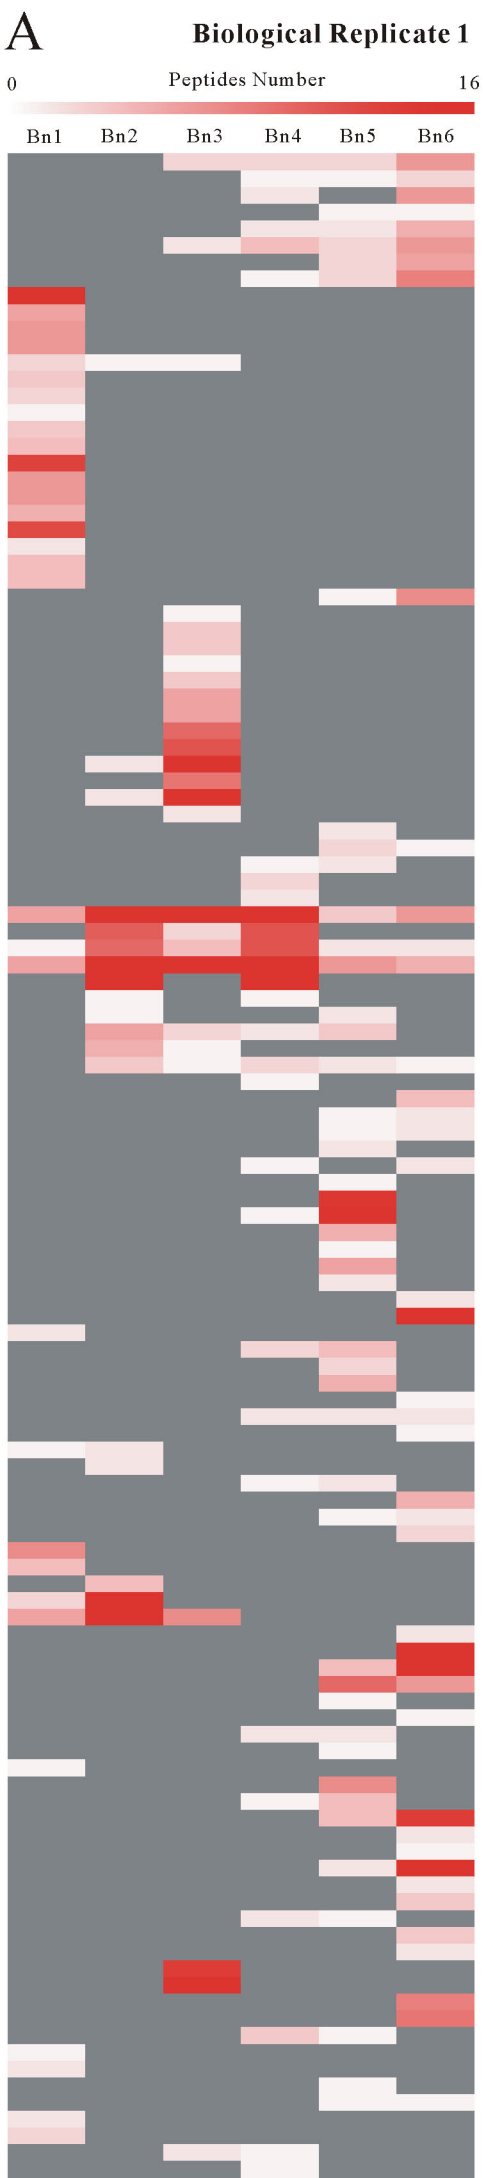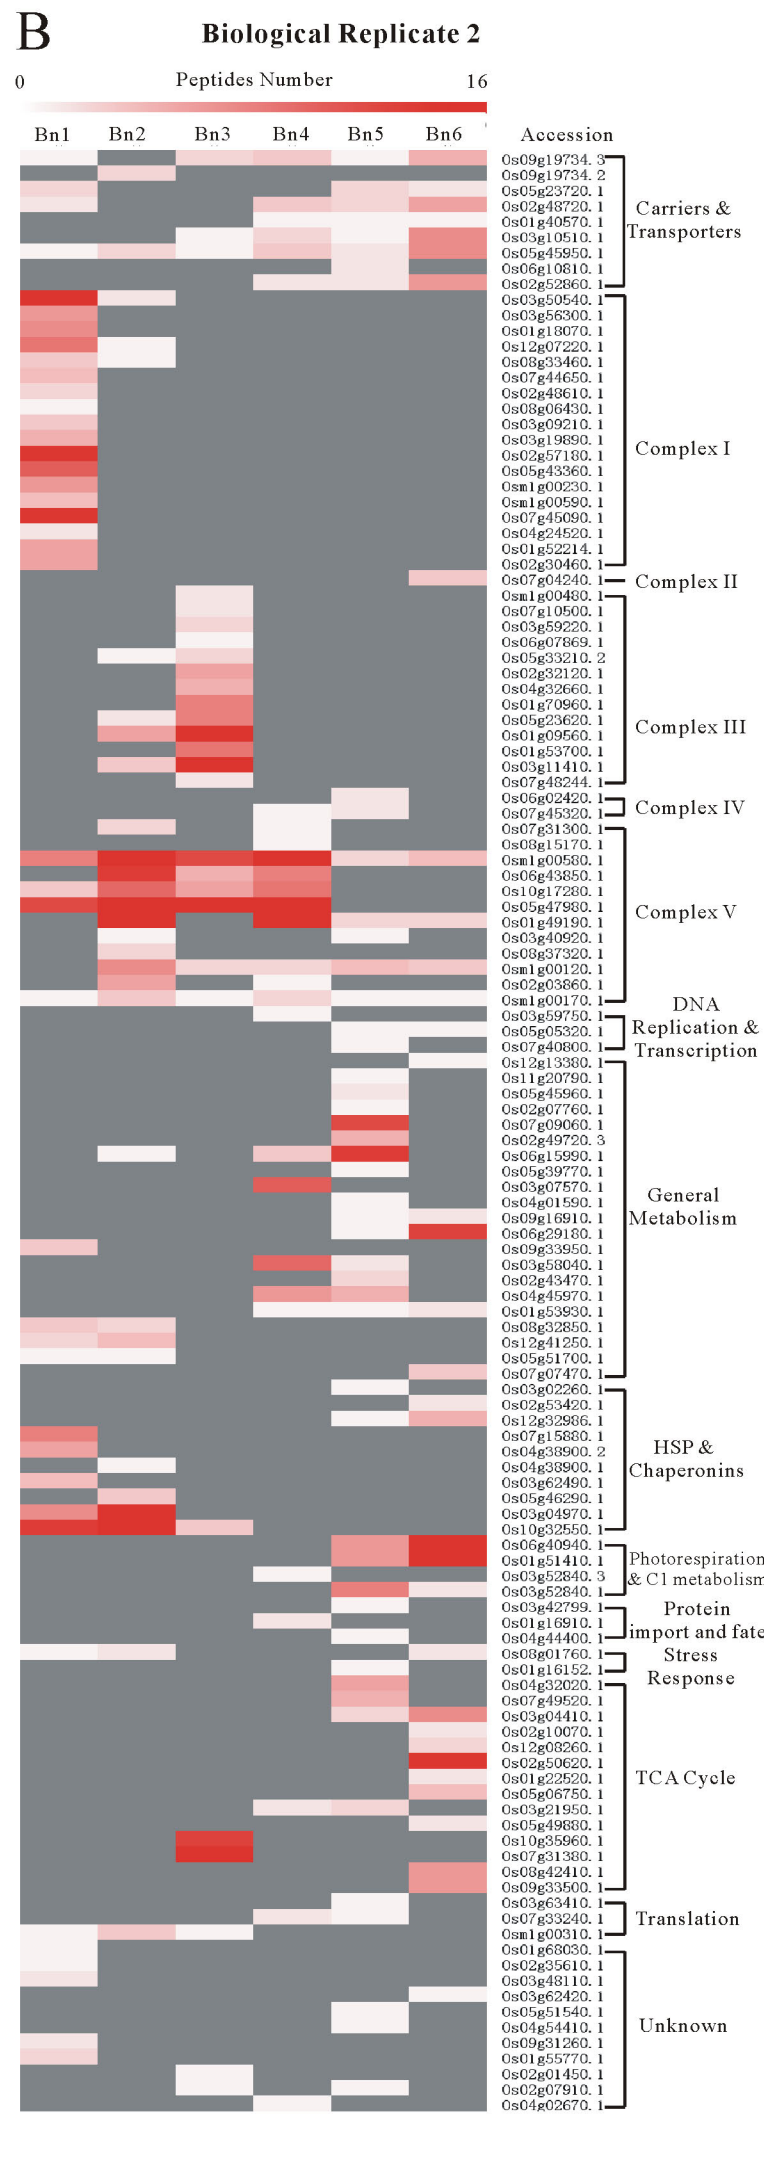

Figure S4

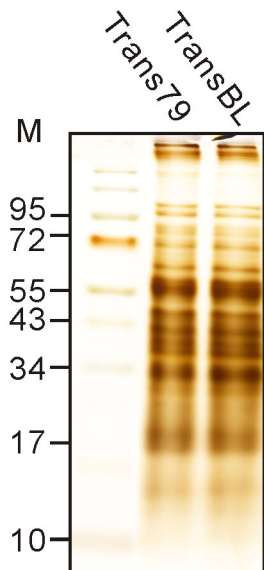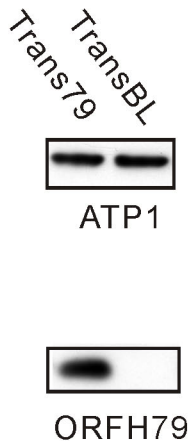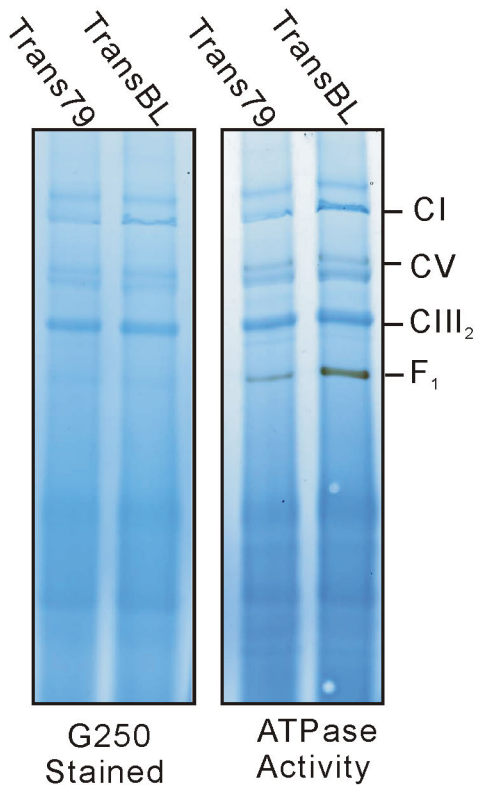

# Figure S5

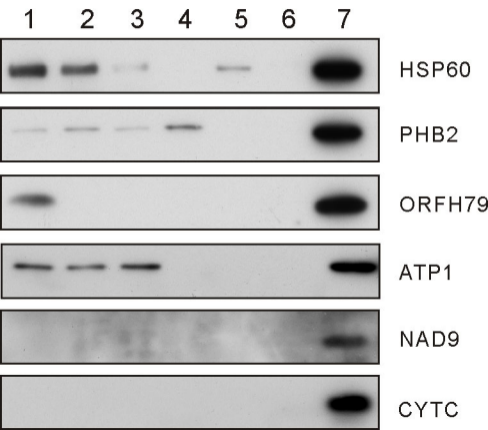

## Light Labeled Peptide

GFGDVLAWADAER Dimethyl (N-term)

 $m/z$ :717.85 charge:2 score:99

A

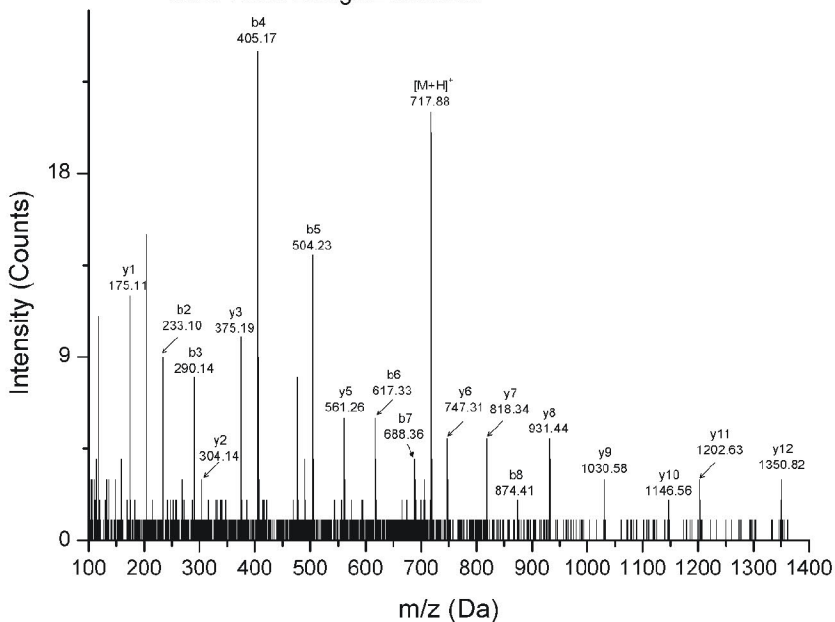

## Heavy Labeled Peptide

GFGDVLAWADAER Dimethyl:2H(4) (N-term)

 $m/z$ :719.86 charge:2 score:80

B

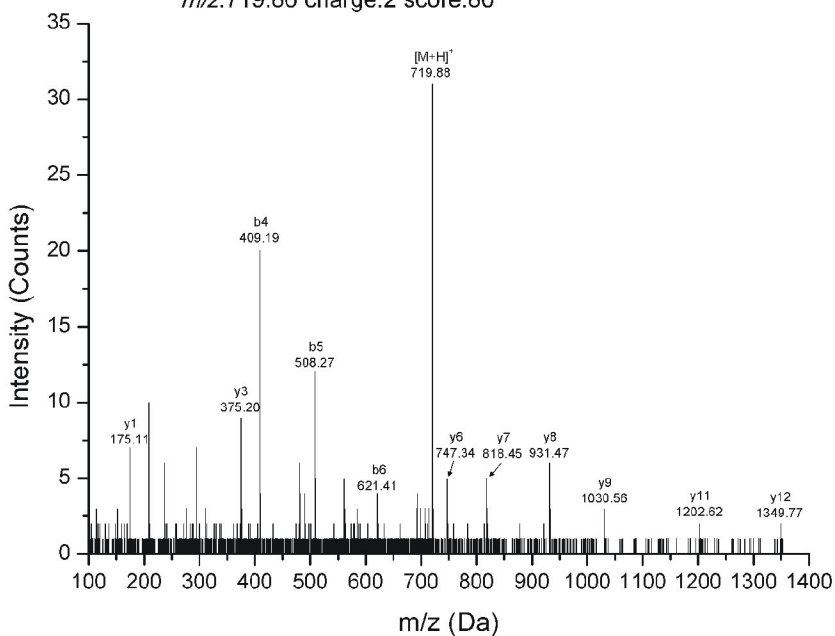

C

protein:Os07g46920

peptide:GFGDVLAWADAER

L/H=3.24

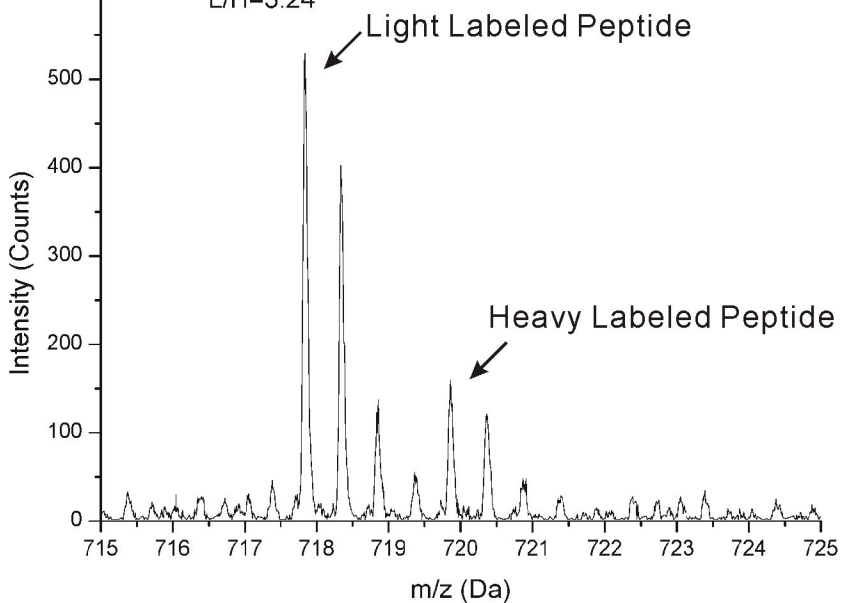

Supplement: supp_M112.382549_jbc.M112.382549-1.pdf [file supp_M112.382549_jbc.M112.382549-1.pdf]
